# Supplementary material for: Childhood socioeconomic disadvantage is associated with lower mortality in older Japanese men: the JAGES cohort study
Source: PubMed Central journal article supplement — Int J Epidemiol. 2016 Jul 10;45(4):1226–35. doi: 10.1093/ije/dyw146 (PMC5965916; doi:10.1093/ije/dyw146), 2016-07-10
Supplement: supp_dyw146_Supplementaey_Table.pdf [file supp_dyw146_Supplementaey_Table.pdf]

1  
2  
3  
4  
5  
6  
7  
8  
9  
10  
11  
12  
13  
14  
15  
16  
17  
18  
19  
20  
21  
22  
23  
24  
25  
26  
27  
28  
29  
30  
31  
32  
33  
34  
35  
36  
37  
38  
39  
40  
41  
42  
43  
44  
45  
46  
47  
48  
49

**Supplementary Table 1** Characteristics of subjects in older Japanese men (n=7143) and women (n=8306) by childhood SES

|                                                   | Male (n=7143)           |            |                       |                | Female (n=8306)         |            |                       |                |
|---------------------------------------------------|-------------------------|------------|-----------------------|----------------|-------------------------|------------|-----------------------|----------------|
|                                                   | Childhood SES           |            |                       |                | Childhood SES           |            |                       |                |
|                                                   | High or middle-high (%) | Middle (%) | Middle-low or low (%) | <i>P-value</i> | High or middle-high (%) | Middle (%) | Middle-low or low (%) | <i>P-value</i> |
| Height <sup>a</sup>                               |                         |            |                       |                |                         |            |                       |                |
| Short                                             | 6.1                     | 7.8        | 9.0                   | <0.0001        | 12.6                    | 12.4       | 15.9                  | <0.0001        |
| Middle-short                                      | 16.9                    | 16.3       | 17.7                  |                | 25.5                    | 29.2       | 29.2                  |                |
| Middle                                            | 28.6                    | 31.2       | 32.9                  |                | 34.9                    | 32.2       | 29.9                  |                |
| Middle-tall                                       | 26.1                    | 25.2       | 25.3                  |                | 16.8                    | 15.9       | 14.9                  |                |
| Tall                                              | 17.9                    | 14.2       | 11.2                  |                | 5.4                     | 4.5        | 3.7                   |                |
| Missing                                           | 4.4                     | 5.3        | 4.0                   |                | 4.8                     | 5.8        | 6.5                   |                |
| Education (years)                                 |                         |            |                       |                |                         |            |                       |                |
| High (≥13)                                        | 34.0                    | 22.5       | 13.3                  | <0.0001        | 19.2                    | 9.3        | 5.9                   | <0.0001        |
| Middle (10–12)                                    | 34.0                    | 33.0       | 28.5                  |                | 44.1                    | 34.5       | 21.1                  |                |
| Low (≤9)                                          | 26.3                    | 39.6       | 54.6                  |                | 32.2                    | 51.6       | 68.4                  |                |
| Other                                             | 1.1                     | 0.7        | 0.5                   |                | 0.4                     | 0.5        | 0.6                   |                |
| Missing                                           | 4.5                     | 4.2        | 3.1                   |                | 4.2                     | 4.1        | 4.0                   |                |
| Normalized current household income (million yen) |                         |            |                       |                |                         |            |                       |                |
| High (≥4.00)                                      | 17.3                    | 11.6       | 7.9                   | <0.0001        | 14.3                    | 7.9        | 6.1                   | <0.0001        |
| Middle (2.00–3.99)                                | 35.5                    | 35.7       | 33.6                  |                | 29.1                    | 28.7       | 25.0                  |                |
| Low (<2.00)                                       | 34.0                    | 36.3       | 45.2                  |                | 33.0                    | 37.3       | 45.0                  |                |

|    |                    |      |      |      |         |      |      |      |
|----|--------------------|------|------|------|---------|------|------|------|
| 1  |                    |      |      |      |         |      |      |      |
| 2  |                    |      |      |      |         |      |      |      |
| 3  |                    |      |      |      |         |      |      |      |
| 4  | Missing            | 13.2 | 16.4 | 13.4 |         | 23.7 | 26.1 | 23.9 |
| 5  | Living situation   |      |      |      |         |      |      |      |
| 6  |                    |      |      |      |         |      |      |      |
| 7  | Own home           | 87.3 | 89.6 | 91.0 | 0.2     | 89.9 | 89.5 | 87.7 |
| 8  | Rent home          | 7.1  | 4.4  | 4.4  |         | 5.1  | 4.9  | 6.5  |
| 9  | Other              | 0.3  | 0.6  | 0.7  |         | 1.0  | 1.0  | 1.2  |
| 10 | Missing            | 5.3  | 5.4  | 4.0  |         | 3.9  | 4.6  | 4.7  |
| 11 | Longest occupation |      |      |      |         |      |      |      |
| 12 |                    |      |      |      |         |      |      |      |
| 13 |                    |      |      |      |         |      |      |      |
| 14 | Non-manual         | 38.2 | 34.4 | 29.3 | <0.0001 | 9.8  | 8.9  | 8.2  |
| 15 | Manual             | 50.7 | 57.0 | 62.2 |         | 59.1 | 62.2 | 65.4 |
| 16 | No occupation      | 0.5  | 0.3  | 0.4  |         | 10.1 | 8.0  | 5.8  |
| 17 | Missing            | 10.7 | 8.3  | 8.1  |         | 21.0 | 20.9 | 20.5 |
| 18 |                    |      |      |      |         |      |      |      |
| 19 |                    |      |      |      |         |      |      |      |
| 20 |                    |      |      |      |         |      |      |      |
| 21 |                    |      |      |      |         |      |      |      |
| 22 |                    |      |      |      |         |      |      |      |
| 23 |                    |      |      |      |         |      |      |      |
| 24 |                    |      |      |      |         |      |      |      |
| 25 |                    |      |      |      |         |      |      |      |
| 26 |                    |      |      |      |         |      |      |      |
| 27 |                    |      |      |      |         |      |      |      |
| 28 |                    |      |      |      |         |      |      |      |
| 29 |                    |      |      |      |         |      |      |      |
| 30 |                    |      |      |      |         |      |      |      |
| 31 |                    |      |      |      |         |      |      |      |
| 32 |                    |      |      |      |         |      |      |      |
| 33 |                    |      |      |      |         |      |      |      |
| 34 |                    |      |      |      |         |      |      |      |
| 35 |                    |      |      |      |         |      |      |      |
| 36 |                    |      |      |      |         |      |      |      |
| 37 |                    |      |      |      |         |      |      |      |
| 38 |                    |      |      |      |         |      |      |      |
| 39 |                    |      |      |      |         |      |      |      |
| 40 |                    |      |      |      |         |      |      |      |
| 41 |                    |      |      |      |         |      |      |      |
| 42 |                    |      |      |      |         |      |      |      |
| 43 |                    |      |      |      |         |      |      |      |
| 44 |                    |      |      |      |         |      |      |      |
| 45 |                    |      |      |      |         |      |      |      |
| 46 |                    |      |      |      |         |      |      |      |
| 47 |                    |      |      |      |         |      |      |      |
| 48 |                    |      |      |      |         |      |      |      |
| 49 |                    |      |      |      |         |      |      |      |

<sup>a</sup>Height (<155, 155–159.9, 160–164.9, 165–169.9, and ≥170cm for men and <145, 145–149.9, 150–154.9, 155–159.9, and ≥160cm for women)

P-values were calculated using x<sup>2</sup> test excluding missing values.

**Supplementary Table 2** All-cause mortality information during the follow up period in older

Japanese men (n=7143) and women (n=8306)

|                       | Male (n=7143)       |                                                 | Female (n=8306)     |                                                 |
|-----------------------|---------------------|-------------------------------------------------|---------------------|-------------------------------------------------|
|                       | Number of death (%) | Incidence rate per 100000 person-years (95% CI) | Number of death (%) | Incidence rate per 100000 person-years (95% CI) |
| Age                   |                     |                                                 |                     |                                                 |
| Younger (65–74 years) | 192 (4.3)           | 3.7 (3.2 - 4.2)                                 | 86 (1.7)            | 1.5 (1.2 - 1.8)                                 |
| Older (75≤ years)     | 306 (11.7)          | 10.6 (9.4 - 11.8)                               | 170 (5.1)           | 4.5 (3.9 - 5.2)                                 |
| Childhood SES         |                     |                                                 |                     |                                                 |
| High or middle-high   | 57 (9.2)            | 8.3 (6.4 - 10.8)                                | 44 (3.3)            | 2.9 (2.1 - 3.8)                                 |
| Middle                | 196 (7.2)           | 6.3 (5.5 - 7.3)                                 | 117 (3.0)           | 2.6 (2.2 - 3.2)                                 |
| Middle-low or low     | 245 (6.5)           | 5.7 (5.0 - 6.4)                                 | 95 (3.1)            | 2.7 (2.2 - 3.3)                                 |
| Height <sup>a</sup>   |                     |                                                 |                     |                                                 |
| Short                 | 72 (12.2)           | 11.0 (8.7 - 13.8)                               | 63 (5.5)            | 4.9 (3.8 - 6.2)                                 |
| Middle-short          | 80 (6.6)            | 5.8 (4.6 - 7.2)                                 | 75 (3.2)            | 2.7 (2.2 - 3.4)                                 |
| Middle                | 142 (6.2)           | 5.5 (4.6 - 6.5)                                 | 61 (2.3)            | 2.0 (1.6 - 2.6)                                 |
| Middle-tall           | 111 (6.1)           | 5.4 (4.5 - 6.5)                                 | 30 (2.3)            | 2.0 (1.4 - 2.9)                                 |
| Tall                  | 52 (5.6)            | 5.0 (3.8 - 6.5)                                 | 8 (2.2)             | 1.9 (1.0 - 3.9)                                 |
| Missing               | 41 (12.7)           | 11.4 (8.4 - 15.4)                               | 19 (3.9)            | 3.4 (2.2 - 5.4)                                 |
| Education (years)     |                     |                                                 |                     |                                                 |
| High (≥13)            | 75 (5.6)            | 5.0 (4.0 - 6.3)                                 | 23 (2.9)            | 2.5 (1.7 - 3.8)                                 |
| Middle (10–12)        | 124 (5.7)           | 4.9 (4.1 - 5.8)                                 | 58 (2.3)            | 1.9 (1.5 - 2.5)                                 |
| Low (≤9)              | 268 (8.1)           | 7.2 (6.3 - 8.1)                                 | 157 (3.5)           | 3.0 (2.6 - 3.5)                                 |
| Other                 | 2 (4.7)             | 4.2 (1.1 - 16.9)                                | 2 (4.9)             | 4.4 (1.1 - 17.6)                                |
| Missing               | 29 (11.2)           | 9.9 (6.9 - 14.3)                                | 16 (4.7)            | 4.2 (2.6 - 6.9)                                 |

<sup>a</sup>Height (<155, 155–159.9, 160–164.9, 165–169.9, and ≥170cm for men and <145, 145–149.9, 150–154.9, 155–159.9, and ≥160cm for women).
